# Supplementary material
Source: PubMed Central journal article supplement (PMC10116877)
Supplement: ehp11134.s001.acco.pdf [file ehp11134.s001.acco.pdf]

**Note to readers with disabilities:** *EHP* strives to ensure that all journal content is accessible to all readers. However, some figures and Supplemental Material published in *EHP* articles may not conform to [508 standards](#) due to the complexity of the information being presented. If you need assistance accessing journal content, please contact [ehp508@niehs.nih.gov](mailto:ehp508@niehs.nih.gov). Our staff will work with you to assess and meet your accessibility needs within 3 working days.

### **Supplemental Material**

#### **Prenatal Exposure to Air Pollution and Pre-Labor Rupture of Membranes in a Prospective Cohort Study: The Role of Maternal Hemoglobin and Iron Supplementation**

Lin Wu, Wan-jun Yin, Li-jun Yu, Yu-hong Wang, Xiao-min Jiang, Ying Zhang, Fang-biao Tao, Rui-xue Tao, and Peng Zhu

#### **Table of Contents**

**Table S1.** The general characteristics of the study population during 2015 to 2021 in Hefei [n (%)].

**Table S2.** Correlations of air pollution in the prenatal period.

**Table S3.** The PROM risk in association with week-specific prenatal air pollution exposure during pregnancy.

**Table S4.** Cumulative effects and average effects between air pollutant exposure and PROM risk in Distributed Lag Model and logistic regression model. (unadjusted models)

**Table S5.** Cumulative effects and average effects between air pollutant exposure and PROM risk in Distributed Lag Model and logistic regression model after adjusting the trimester.

**Table S6.** Association of prenatal air pollution exposure with the term PROM and preterm PROM.

**Table S7.** Association of air pollution exposure and PROM in co-pollutant models.

**Table S8.** The estimated change in hemoglobin levels in third trimester was calculated for each quartile and each unit increment in PM<sub>2.5</sub>, PM<sub>10</sub>, SO<sub>2</sub>, and CO during the second and third trimesters using linear regression model.

**Table S9.** Association of air pollution exposure and hemoglobin levels in co-pollutant models.

**Table S10.** The relationship between hemoglobin levels and PROM risk in logistic models.

**Table S11.** Correlation matrix eigenvalues of multiple air pollutants model on second to third trimester and corresponding eigenvector.

**Table S12.** The association between iron supplementation and PROM risk stratified by air pollution levels in anemia women.

**Figure S1.** Directed acyclic graph for the association between air pollution exposure and PROM  
GDM: Gestational diabetes mellitus, PROM: pre-labor rupture of membranes.

**Supplement Table 1** The general characteristics of the study population during 2015 to 2021 in Hefei [n (%)]

| Characteristics                                               | Included<br>(n = 6824) | Excluded<br>(n=2496) | <i>P</i> value <sup>a</sup> |
|---------------------------------------------------------------|------------------------|----------------------|-----------------------------|
| <b>Sociodemographic characteristics, n (%)</b>                |                        |                      |                             |
| Age, years                                                    |                        |                      | 0.281                       |
| <25                                                           | 1666 (24.4)            | 647 (25.9)           |                             |
| 25–34                                                         | 4476 (65.6)            | 1595(63.9)           |                             |
| ≥35                                                           | 682 (10.0)             | 254 (10.2)           |                             |
| Education                                                     |                        |                      | 0.159                       |
| Junior high school                                            | 941 (13.8)             | 382 (15.3)           |                             |
| High school                                                   | 1655 (24.3)            | 583 (23.4)           |                             |
| Bachelor's degree and above                                   | 4228 (62.0)            | 1531 (61.3)          |                             |
| Family income, RMB/month                                      |                        |                      | 0.220                       |
| ≤3999                                                         | 2149 (31.5)            | 753 (30.2)           |                             |
| 4000–7999                                                     | 4132 (60.6)            | 1521 (60.9)          |                             |
| ≥8000                                                         | 543 (8.0)              | 222 (8.9)            |                             |
| Parity                                                        |                        |                      | 0.170                       |
| Primipara                                                     | 2611 (38.3)            | 994 (39.8)           |                             |
| Multipara                                                     | 4213 (61.7)            | 1502 (60.2)          |                             |
| Season of delivery                                            |                        |                      | 0.003                       |
| Spring                                                        | 1756 (25.7)            | 658 (27.3)           |                             |
| Summer                                                        | 1800 (26.4)            | 635 (26.3)           |                             |
| Autumn                                                        | 1730 (25.4)            | 605 (25.1)           |                             |
| Winter                                                        | 1538 (22.5)            | 515 (21.3)           |                             |
| missing                                                       | 0                      | 83                   |                             |
| Enrollment years                                              |                        |                      | 0.063                       |
| 2015-2016                                                     | 2420(35.5)             | 831(33.3)            |                             |
| 2017-2018                                                     | 2534(37.1)             | 989 (39.6)           |                             |
| 2019-2021                                                     | 1870(27.4)             | 676 (27.1)           |                             |
| <b>Perinatal health lifestyle factors, n (%) <sup>b</sup></b> |                        |                      |                             |
| Vegetable intake, times/week                                  |                        |                      | 0.887                       |
| < 3                                                           | 231 (3.4)              | 83 (3.3)             |                             |
| ≥ 3                                                           | 6593 (96.6)            | 2413 (96.7)          |                             |
| Fruit intake, times/week                                      |                        |                      | 0.203                       |
| < 3                                                           | 470 (6.9)              | 191 (7.7)            |                             |
| ≥ 3                                                           | 6354 (93.1)            | 2305 (92.3)          |                             |
| Dessert intake, times/week                                    |                        |                      | 0.915                       |
| < 3                                                           | 5633 (82.5)            | 2058(82.5)           |                             |
| ≥ 3                                                           | 1191 (17.5)            | 438 (17.5)           |                             |
| Physical activity, days/week                                  |                        |                      | 0.525                       |
| < 3                                                           | 5394 (79.0)            | 1988 (79.6)          |                             |
| ≥ 3                                                           | 1430 (21.0)            | 508(20.4)            |                             |
| Folic acid supplementation, days/week                         |                        |                      | 0.869                       |
| < 3                                                           | 4387(64.3)             | 1600 (64.1)          |                             |
| ≥ 3                                                           | 2437(35.7)             | 896 (35.9)           |                             |
| Iron supplementation, days/week                               |                        |                      | 0.180                       |
| < 3                                                           | 5847(85.7)             | 2111 (84.6)          |                             |
| ≥ 3                                                           | 977(14.3)              | 385 (15.4)           |                             |
| Passive smoking                                               |                        |                      | 0.056                       |
| Never                                                         | 5598(82.0)             | 2090(83.8)           |                             |
| Ever                                                          | 1226(18.0)             | 406(16.2)            |                             |
| <b>Perinatal health status, n (%)</b>                         |                        |                      |                             |
| Pre-pregnancy BMI, kg/m <sup>2</sup>                          |                        |                      | 0.042                       |
| < 18.5                                                        | 985 (14.4)             | 373 (14.9)           |                             |
| 18.5–23.9                                                     | 4816 (70.6)            | 1722 (69.0)          |                             |
| ≥ 24.0                                                        | 1023 (15.0)            | 400(16.2)            |                             |
| Hypertension during pregnancy                                 | 139(2.0)               | 55(2.2)              | 0.650                       |

|                               |             |             |       |
|-------------------------------|-------------|-------------|-------|
| Vaginitis                     | 783 (11.5)  | 269 (10.8)  | 0.346 |
| Gestational diabetes mellitus |             |             | 0.495 |
| Yes                           | 1424 (20.9) | 532(21.5)   |       |
| No                            | 5400 (79.1) | 1940 (78.5) |       |
| Missing                       | 0           | 24          |       |
| Premature birth               | 229 (3.4)   | 102 (4.1)   | 0.114 |
| Maternal anemia               | 2290 (33.6) | 882 (35.3)  | 0.109 |

PROM: pre-labor rupture of membranes.

<sup>a</sup> Based on the chi-square test.

<sup>b</sup> The frequency of vegetable intake, fruit intake, dessert intake , physical activity was during second trimester. The frequency of folic acid supplementation intake was during first trimester. The frequency of iron supplementation was during the third trimester.

**Supplement Table 2** Correlations of air pollution in the prenatal period

| Pollutions        | First trimester   |                  |        |                 | Second trimester  |                  |        |                 | Third trimester   |                  |        |                 |
|-------------------|-------------------|------------------|--------|-----------------|-------------------|------------------|--------|-----------------|-------------------|------------------|--------|-----------------|
|                   | PM <sub>2.5</sub> | PM <sub>10</sub> | CO     | SO <sub>2</sub> | PM <sub>2.5</sub> | PM <sub>10</sub> | CO     | SO <sub>2</sub> | PM <sub>2.5</sub> | PM <sub>10</sub> | CO     | SO <sub>2</sub> |
| First trimester   |                   |                  |        |                 |                   |                  |        |                 |                   |                  |        |                 |
| PM <sub>2.5</sub> | 1.00              | 0.94             | 0.92   | 0.74            | 0.13              | 0.25             | 0.02   | 0.24            | ,0.65             | ,0.53            | ,0.43  | ,0.18           |
| P-value           |                   | <0.001           | <0.001 | <0.001          | <0.001            | <0.001           | <0.001 | <0.001          | <0.001            | <0.001           | <0.001 | <0.001          |
| PM <sub>10</sub>  |                   | 1.00             | 0.89   | 0.83            | 0.12              | 0.21             | 0.07   | 0.30            | ,0.52             | ,0.42            | ,0.28  | ,0.38           |
| P-value           |                   |                  | <0.001 | <0.001          | <0.001            | <0.001           | <0.001 | <0.001          | <0.001            | <0.001           | <0.001 | <0.001          |
| CO                |                   |                  | 1.00   | 0.83            | 0.41              | 0.52             | 0.32   | 0.51            | ,0.46             | ,0.34            | ,0.28  | 0.01            |
| P-value           |                   |                  |        | <0.001          | <0.001            | <0.001           | <0.001 | <0.001          | <0.001            | <0.001           | <0.001 | 0.344           |
| SO <sub>2</sub>   |                   |                  |        | 1.00            | 0.31              | 0.37             | 0.36   | 0.59            | ,0.17             | ,0.09            | 0.05   | 0.28            |
| P-value           |                   |                  |        |                 | <0.001            | <0.001           | <0.001 | <0.001          | <0.001            | <0.001           | <0.001 | <0.001          |
| Second trimester  |                   |                  |        |                 |                   |                  |        |                 |                   |                  |        |                 |
| PM <sub>2.5</sub> |                   |                  |        |                 | 1.00              | 0.93             | 0.91   | 0.73            | 0.19              | 0.26             | 0.02   | 0.19            |
| P-value           |                   |                  |        |                 |                   | <0.001           | <0.001 | <0.001          | <0.001            | <0.001           | 0.043  | <0.001          |
| PM <sub>10</sub>  |                   |                  |        |                 |                   | 1.00             | 0.86   | 0.79            | 0.11              | 0.17             | 0.01   | 0.20            |
| P-value           |                   |                  |        |                 |                   |                  | <0.001 | <0.001          | <0.001            | <0.001           | 0.388  | <0.001          |
| CO                |                   |                  |        |                 |                   |                  | 1.00   | 0.84            | 0.48              | 0.56             | 0.35   | 0.50            |
| P-value           |                   |                  |        |                 |                   |                  |        | <0.001          | <0.001            | <0.001           | <0.001 | <0.001          |
| SO <sub>2</sub>   |                   |                  |        |                 |                   |                  |        | 1.00            | 0.38              | 0.42             | 0.41   | 0.62            |
| P-value           |                   |                  |        |                 |                   |                  |        |                 | <0.001            | <0.001           | <0.001 | <0.001          |
| Third trimester   |                   |                  |        |                 |                   |                  |        |                 |                   |                  |        |                 |
| PM <sub>2.5</sub> |                   |                  |        |                 |                   |                  |        |                 | 1.00              | 0.92             | 0.90   | 0.72            |
| P-value           |                   |                  |        |                 |                   |                  |        |                 |                   | <0.001           | <0.001 | <0.001          |
| PM <sub>10</sub>  |                   |                  |        |                 |                   |                  |        |                 |                   | 1.00             | 0.83   | 0.77            |
| P-value           |                   |                  |        |                 |                   |                  |        |                 |                   |                  | <0.001 | <0.001          |
| CO                |                   |                  |        |                 |                   |                  |        |                 |                   |                  | 1.00   | 0.83            |
| P-value           |                   |                  |        |                 |                   |                  |        |                 |                   |                  |        | <0.001          |

Correlations were calculated using Spearman's correlation coefficient.

### Supplement Table 3

The PROM risk in association with week-specific prenatal air pollution exposure during pregnancy <sup>a</sup>

| Gestational weeks | PM2.5 <sup>b</sup> |             | PM10 <sup>b</sup> |             | SO2 <sup>b</sup> |             | CO <sup>b</sup> |             |
|-------------------|--------------------|-------------|-------------------|-------------|------------------|-------------|-----------------|-------------|
|                   | OR                 | (95%CI)     | OR                | (95%CI)     | OR               | (95%CI)     | OR              | (95%CI)     |
| Week 1            | 0.985              | 0.961,1.010 | 1.022             | 1.001,1.043 | 1.025            | 0.965,1.091 | 0.996           | 0.972,1.023 |
| Week 2            | 0.993              | 0.971,1.013 | 1.013             | 0.993,1.034 | 1.018            | 0.962,1.081 | 1.006           | 0.980,1.030 |
| Week 3            | 0.999              | 0.978,1.021 | 1.007             | 0.987,1.028 | 1.015            | 0.962,1.076 | 1.012           | 0.987,1.036 |
| Week 4            | 1.003              | 0.983,1.027 | 1.002             | 0.982,1.023 | 1.015            | 0.963,1.075 | 1.016           | 0.991,1.040 |
| Week 5            | 1.004              | 0.986,1.030 | 0.999             | 0.979,1.019 | 1.018            | 0.967,1.078 | 1.018           | 0.993,1.043 |
| Week 6            | 1.004              | 0.987,1.031 | 0.998             | 0.977,1.018 | 1.023            | 0.972,1.083 | 1.019           | 0.995,1.043 |
| Week 7            | 1.003              | 0.987,1.030 | 0.997             | 0.976,1.017 | 1.030            | 0.978,1.090 | 1.019           | 0.995,1.044 |
| Week 8            | 1.003              | 0.987,1.029 | 0.997             | 0.977,1.018 | 1.039            | 0.985,1.100 | 1.020           | 0.995,1.044 |
| Week 9            | 1.003              | 0.988,1.029 | 0.999             | 0.978,1.019 | 1.048            | 0.992,1.110 | 1.020           | 0.995,1.044 |
| Week 10           | 1.006              | 0.989,1.030 | 1.000             | 0.979,1.021 | 1.058            | 1.000,1.121 | 1.021           | 0.996,1.045 |
| Week 11           | 1.009              | 0.990,1.033 | 1.003             | 0.981,1.024 | 1.067            | 1.008,1.133 | 1.023           | 0.997,1.047 |
| Week 12           | 1.013              | 0.993,1.037 | 1.005             | 0.984,1.027 | 1.077            | 1.016,1.144 | 1.025           | 0.998,1.050 |
| Week 13           | 1.018              | 0.995,1.042 | 1.008             | 0.987,1.030 | 1.087            | 1.023,1.155 | 1.027           | 1.000,1.053 |
| Week 14           | 1.024              | 0.998,1.048 | 1.012             | 0.990,1.033 | 1.096            | 1.030,1.165 | 1.030           | 1.003,1.057 |
| Week 15           | 1.029              | 1.001,1.054 | 1.015             | 0.993,1.036 | 1.104            | 1.036,1.175 | 1.033           | 1.005,1.062 |
| Week 16           | 1.033              | 1.003,1.060 | 1.018             | 0.996,1.039 | 1.111            | 1.041,1.183 | 1.036           | 1.008,1.066 |
| Week 17           | 1.037              | 1.006,1.065 | 1.021             | 0.998,1.042 | 1.117            | 1.045,1.190 | 1.039           | 1.010,1.069 |
| Week 18           | 1.040              | 1.008,1.069 | 1.023             | 1.001,1.045 | 1.122            | 1.049,1.196 | 1.042           | 1.012,1.072 |
| Week 19           | 1.042              | 1.010,1.072 | 1.025             | 1.003,1.048 | 1.125            | 1.051,1.200 | 1.044           | 1.015,1.075 |
| Week 20           | 1.043              | 1.011,1.074 | 1.027             | 1.005,1.050 | 1.127            | 1.053,1.203 | 1.046           | 1.017,1.077 |
| Week 21           | 1.044              | 1.013,1.074 | 1.029             | 1.007,1.051 | 1.128            | 1.053,1.204 | 1.048           | 1.018,1.077 |
| Week 22           | 1.044              | 1.014,1.074 | 1.030             | 1.009,1.053 | 1.127            | 1.053,1.203 | 1.048           | 1.019,1.077 |
| Week 23           | 1.044              | 1.015,1.073 | 1.030             | 1.009,1.053 | 1.125            | 1.052,1.201 | 1.048           | 1.020,1.077 |
| Week 24           | 1.043              | 1.016,1.072 | 1.031             | 1.010,1.054 | 1.122            | 1.049,1.198 | 1.048           | 1.020,1.075 |
| Week 25           | 1.042              | 1.016,1.070 | 1.030             | 1.010,1.053 | 1.118            | 1.046,1.194 | 1.046           | 1.020,1.072 |
| Week 26           | 1.041              | 1.016,1.067 | 1.029             | 1.010,1.053 | 1.113            | 1.043,1.189 | 1.043           | 1.018,1.069 |
| Week 27           | 1.039              | 1.015,1.065 | 1.028             | 1.009,1.052 | 1.108            | 1.039,1.183 | 1.040           | 1.016,1.064 |
| Week 28           | 1.037              | 1.013,1.061 | 1.027             | 1.008,1.050 | 1.101            | 1.034,1.176 | 1.036           | 1.013,1.060 |
| Week 29           | 1.034              | 1.010,1.058 | 1.025             | 1.007,1.049 | 1.095            | 1.030,1.170 | 1.031           | 1.010,1.055 |
| Week 30           | 1.031              | 1.007,1.055 | 1.023             | 1.005,1.047 | 1.088            | 1.025,1.164 | 1.028           | 1.006,1.051 |
| Week 31           | 1.028              | 1.004,1.052 | 1.021             | 1.003,1.045 | 1.083            | 1.021,1.159 | 1.025           | 1.002,1.048 |
| Week 32           | 1.026              | 1.002,1.050 | 1.019             | 1.001,1.042 | 1.078            | 1.018,1.155 | 1.023           | 0.999,1.046 |
| Week 33           | 1.025              | 1.001,1.050 | 1.017             | 0.999,1.040 | 1.074            | 1.015,1.152 | 1.022           | 0.997,1.047 |
| Week 34           | 1.027              | 1.002,1.052 | 1.015             | 0.997,1.038 | 1.071            | 1.014,1.152 | 1.024           | 0.998,1.051 |
| Week 35           | 1.031              | 1.006,1.057 | 1.013             | 0.995,1.036 | 1.071            | 1.014,1.155 | 1.029           | 1.000,1.057 |
| Week 36           | 1.036              | 1.010,1.062 | 1.012             | 0.993,1.035 | 1.073            | 1.016,1.161 | 1.034           | 1.006,1.064 |

|         |       |             |       |             |       |             |       |             |
|---------|-------|-------------|-------|-------------|-------|-------------|-------|-------------|
| Week 37 | 1.039 | 1.013,1.065 | 1.011 | 0.991,1.034 | 1.079 | 1.020,1.171 | 1.039 | 1.012,1.067 |
|---------|-------|-------------|-------|-------------|-------|-------------|-------|-------------|

<sup>a</sup> The PROM risk in association with week-specific prenatal air pollution exposure during pregnancy

<sup>b</sup> The per increase in PM<sub>2.5</sub> and PM<sub>10</sub> was 10 µg/m<sup>3</sup>, the per increase in SO<sub>2</sub> was 5 µg/m<sup>3</sup>, and the per increase in CO was 0.1 mg/m<sup>3</sup>. Models were based on a distributed lag (non-linear) model and adjusted for age, education, income, parity, activity, passive smoking, folic acid supplementation, iron supplementation, pre-pregnancy BMI, hypertension during pregnancy, gestational diabetes mellitus, vaginitis, and temperature.

**Supplement Table 4**

Cumulative effects and average effects between air pollutant exposure and PROM risk in Distributed Lag Model and logistic regression model. ( unadjusted models)

| Pollutions                                          | Mean | SD   | <i>OR (95%CI) for PROM<sup>d</sup></i> |                        |
|-----------------------------------------------------|------|------|----------------------------------------|------------------------|
|                                                     |      |      | Distributed lag model                  | Average exposure model |
| <b>First trimester</b>                              |      |      |                                        |                        |
| PM <sub>2.5</sub> (ug/m <sup>3</sup> ) <sup>a</sup> | 57.7 | 18.6 | 1.02(0.99,1.05)                        | 1.01(0.98,1.04)        |
| PM <sub>10</sub> (ug/m <sup>3</sup> ) <sup>a</sup>  | 87.0 | 17.0 | 1.02(0.98,1.06)                        | 1.03(0.99,1.10)        |
| SO <sub>2</sub> (ug/m <sup>3</sup> ) <sup>b</sup>   | 17.8 | 4.9  | 1.09(1.02,1.15)                        | 1.05(0.99,1.11)        |
| CO (mg/m <sup>3</sup> ) <sup>c</sup>                | 0.9  | 0.2  | 1.04(1.01,1.08)                        | 1.04(0.99,1.07)        |
| <b>Second trimester</b>                             |      |      |                                        |                        |
| PM <sub>2.5</sub> (ug/m <sup>3</sup> ) <sup>a</sup> | 54.6 | 18.1 | 1.06(1.10,1.13)                        | 1.06(1.03,1.09)        |
| PM <sub>10</sub> (ug/m <sup>3</sup> ) <sup>a</sup>  | 84.1 | 16.3 | 1.09(1.05,1.13)                        | 1.09(1.05,1.26)        |
| SO <sub>2</sub> (ug/m <sup>3</sup> ) <sup>b</sup>   | 12.1 | 4.4  | 1.15(1.08,1.23)                        | 1.15(1.09,1.21)        |
| CO (mg/m <sup>3</sup> ) <sup>c</sup>                | 0.9  | 0.2  | 1.08(1.04,1.12)                        | 1.08(1.04,1.12)        |
| <b>Third trimester</b>                              |      |      |                                        |                        |
| PM <sub>2.5</sub> (ug/m <sup>3</sup> ) <sup>a</sup> | 54.0 | 19.0 | 1.06(1.03,1.09)                        | 1.04(1.01,1.08)        |
| PM <sub>10</sub> (ug/m <sup>3</sup> ) <sup>a</sup>  | 82.2 | 16.9 | 1.06(1.03,1.10)                        | 1.05(1.01,1.09)        |
| SO <sub>2</sub> (ug/m <sup>3</sup> ) <sup>b</sup>   | 11.5 | 4.2  | 1.15(1.07,1.24)                        | 1.14(1.09,1.19)        |
| CO (mg/m <sup>3</sup> ) <sup>c</sup>                | 0.9  | 0.2  | 1.06(1.03,1.09)                        | 1.07(1.03,1.11)        |
| <b>Second and third trimester</b>                   |      |      |                                        |                        |
| PM <sub>2.5</sub> (ug/m <sup>3</sup> ) <sup>a</sup> | 54.2 | 15.1 | 1.10(1.05,1.14)                        | 1.09(1.05,1.13)        |
| PM <sub>10</sub> (ug/m <sup>3</sup> ) <sup>a</sup>  | 83.2 | 13.5 | 1.13(1.08,1.18)                        | 1.12(1.07,1.17)        |
| SO <sub>2</sub> (ug/m <sup>3</sup> ) <sup>b</sup>   | 11.8 | 4.0  | 1.16(1.07,1.25)                        | 1.20(1.10,1.25)        |
| CO (mg/m <sup>3</sup> ) <sup>c</sup>                | 0.9  | 0.2  | 1.10(1.05,1.14)                        | 1.11(1.07,1.15)        |

PROM: pre-labor rupture of membranes.

<sup>a</sup> per increase in 10 µg/m<sup>3</sup>, <sup>b</sup> per increase in 5 µg/m<sup>3</sup>, <sup>c</sup> per increase in 0.1 mg/m<sup>3</sup>

<sup>d</sup> Estimated by distributed lag models using weekly mean exposures, and by mean air pollution during specific exposure windows (average exposure model).



**Supplement Table 5** Cumulative effects and average effects between air pollutant exposure and PROM risk in Distributed Lag Model and logistic regression model after adjusting the trimester.

| Pollutions                                          | Mean | SD   | OR (95%CI) of PROM <sup>d</sup>    |                                     |
|-----------------------------------------------------|------|------|------------------------------------|-------------------------------------|
|                                                     |      |      | Distributed Lag Model <sup>e</sup> | Average Exposure Model <sup>f</sup> |
| <b>First trimester</b>                              |      |      |                                    |                                     |
| PM <sub>2.5</sub> (ug/m <sup>3</sup> ) <sup>a</sup> | 57.7 | 18.6 | 1.01 (0.98,1.04)                   | 1.02 (0.99,1.05)                    |
| PM <sub>10</sub> (ug/m <sup>3</sup> ) <sup>a</sup>  | 87.0 | 17.0 | 1.02 (0.98,1.05)                   | 1.02 (0.98,1.05)                    |
| SO <sub>2</sub> (ug/m <sup>3</sup> ) <sup>b</sup>   | 17.8 | 4.9  | 1.06 (0.98,1.16)                   | 1.07 (0.98,1.17)                    |
| CO (mg/m <sup>3</sup> ) <sup>c</sup>                | 0.9  | 0.2  | 1.03 (0.99,1.07)                   | 1.04 (1.00,1.07)                    |
| <b>Second trimester</b>                             |      |      |                                    |                                     |
| PM <sub>2.5</sub> (ug/m <sup>3</sup> ) <sup>a</sup> | 54.6 | 18.1 | 1.11 (1.04,1.19)                   | 1.12 (1.07,1.17)                    |
| PM <sub>10</sub> (ug/m <sup>3</sup> ) <sup>a</sup>  | 84.1 | 16.3 | 1.14 (1.07,1.22)                   | 1.15 (1.10,1.21)                    |
| SO <sub>2</sub> (ug/m <sup>3</sup> ) <sup>b</sup>   | 12.1 | 4.4  | 1.13 (1.03,1.24)                   | 1.19 (1.11,1.28)                    |
| CO (mg/m <sup>3</sup> ) <sup>c</sup>                | 0.9  | 0.2  | 1.09(1.03,1.14)                    | 1.12 (1.08,1.14)                    |
| <b>Third trimester</b>                              |      |      |                                    |                                     |
| PM <sub>2.5</sub> (ug/m <sup>3</sup> ) <sup>a</sup> | 54.0 | 19.0 | 1.04 (1.01,1.08)                   | 1.05 (1.02,1.08)                    |
| PM <sub>10</sub> (ug/m <sup>3</sup> ) <sup>a</sup>  | 82.2 | 16.9 | 1.05 (1.01,1.09)                   | 1.06 (1.02,1.10)                    |
| SO <sub>2</sub> (ug/m <sup>3</sup> ) <sup>b</sup>   | 11.5 | 4.2  | 1.14 (1.05,1.25)                   | 1.13 (1.05,1.21)                    |
| CO (mg/m <sup>3</sup> ) <sup>c</sup>                | 0.9  | 0.2  | 1.06 (1.02,1.10)                   | 1.07 (1.03,1.11)                    |
| <b>Second and third trimesters</b>                  |      |      |                                    |                                     |
| PM <sub>2.5</sub> (ug/m <sup>3</sup> ) <sup>a</sup> | 54.2 | 15.1 | 1.13 (1.06,1.22)                   | 1.08(1.03,1.13)                     |
| PM <sub>10</sub> (ug/m <sup>3</sup> ) <sup>a</sup>  | 83.2 | 13.5 | 1.18 (1.10,1.27)                   | 1.11(1.06,1.17)                     |
| SO <sub>2</sub> (ug/m <sup>3</sup> ) <sup>b</sup>   | 11.8 | 4.0  | 1.16 (1.06,1.28)                   | 1.16(1.07,1.25)                     |
| CO (mg/m <sup>3</sup> ) <sup>c</sup>                | 0.9  | 0.2  | 1.10 (1.04,1.15)                   | 1.09(1.04,1.14)                     |

PROM: pre-labor rupture of membranes.

<sup>a</sup> per increase in 10 µg/m<sup>3</sup>, <sup>b</sup> per increase in 5 µg/m<sup>3</sup>, <sup>c</sup> per increase in 0.1 mg/m<sup>3</sup>

<sup>d</sup> Estimated by distributed lag models using weekly mean exposures, and by mean air pollution during specific exposure windows (average exposure model).

<sup>e</sup> The models were adjusted for age, education, income, parity, activity, passive smoking, folic acid supplementation, iron supplementation, pre-pregnancy BMI, hypertension during pregnancy, gestational diabetes mellitus, vaginitis, temperature.

<sup>f</sup> The models were adjusted for age, education, income, parity, activity, passive smoking, folic acid supplementation, iron supplementation, pre-pregnancy BMI, hypertension during pregnancy, gestational diabetes mellitus, vaginitis, temperature. And air pollution in the other two trimesters.

**Supplement Table 6** Association of prenatal air pollution exposure with the term PROM and preterm PROM

| Pollutions                                          | Mean | SD   | OR (95%CI) <sup>d</sup> |                     |
|-----------------------------------------------------|------|------|-------------------------|---------------------|
|                                                     |      |      | Term PROM(n=1328)       | Preterm PROM(n=111) |
| <b>First trimester</b>                              |      |      |                         |                     |
| PM <sub>2.5</sub> (ug/m <sup>3</sup> ) <sup>a</sup> | 57.7 | 18.6 | 1.01 (0.98,1.04)        | 0.88 (0.64,1.21)    |
| PM <sub>10</sub> (ug/m <sup>3</sup> ) <sup>a</sup>  | 87.0 | 17.0 | 1.03 (0.99,1.10)        | 0.85 (0.68,1.06)    |
| SO <sub>2</sub> (ug/m <sup>3</sup> ) <sup>b</sup>   | 17.8 | 4.9  | 1.05 (0.99,1.11)        | 0.93 (0.85,1.01)    |
| CO (mg/m <sup>3</sup> ) <sup>c</sup>                | 0.9  | 0.2  | 1.03 (0.99,1.07)        | 0.86 (0.68,1.09)    |
| <b>Second trimester</b>                             |      |      |                         |                     |
| PM <sub>2.5</sub> (ug/m <sup>3</sup> ) <sup>a</sup> | 54.6 | 18.1 | 1.14 (1.07,1.22)        | 1.01 (0.98,1.03)    |
| PM <sub>10</sub> (ug/m <sup>3</sup> ) <sup>a</sup>  | 84.1 | 16.3 | 1.17 (1.10,1.26)        | 1.01 (0.98,1.03)    |
| SO <sub>2</sub> (ug/m <sup>3</sup> ) <sup>b</sup>   | 12.1 | 4.4  | 1.15 (1.05,1.26)        | 0.86 (0.68,1.09)    |
| CO (mg/m <sup>3</sup> ) <sup>c</sup>                | 0.9  | 0.2  | 1.11 (1.06,1.17)        | 1.07 (0.76,1.49)    |
| <b>Third trimester</b>                              |      |      |                         |                     |
| PM <sub>2.5</sub> (ug/m <sup>3</sup> ) <sup>a</sup> | 54.0 | 19.0 | 1.04 (1.01,1.08)        | 1.01 (0.98,1.03)    |
| PM <sub>10</sub> (ug/m <sup>3</sup> ) <sup>a</sup>  | 82.2 | 16.9 | 1.05 (1.01,1.09)        | 1.09 (0.78,1.56)    |
| SO <sub>2</sub> (ug/m <sup>3</sup> ) <sup>b</sup>   | 11.5 | 4.2  | 1.13 (1.04,1.23)        | 0.97 (0.88,1.07)    |
| CO (mg/m <sup>3</sup> ) <sup>c</sup>                | 0.9  | 0.2  | 1.07 (1.03,1.11)        | 1.02 (0.71,1.48)    |
| <b>Second and third trimesters</b>                  |      |      |                         |                     |
| PM <sub>2.5</sub> (ug/m <sup>3</sup> ) <sup>a</sup> | 54.2 | 15.1 | 1.13 (1.05,1.23)        | 1.01 (0.71,1.45)    |
| PM <sub>10</sub> (ug/m <sup>3</sup> ) <sup>a</sup>  | 83.2 | 13.5 | 1.21 (1.13,1.29)        | 1.09 (0.78,1.56)    |
| SO <sub>2</sub> (ug/m <sup>3</sup> ) <sup>b</sup>   | 11.8 | 4.0  | 1.20 (1.09,1.32)        | 0.98 (0.90,1.07)    |
| CO (mg/m <sup>3</sup> ) <sup>c</sup>                | 0.9  | 0.2  | 1.12 (1.05,1.19)        | 0.95 (0.66,1.35)    |

PROM: pre-labor rupture of membranes.

<sup>a</sup> per increase in 10 µg/m<sup>3</sup>, <sup>b</sup> per increase in 5 µg/m<sup>3</sup>, <sup>c</sup> per increase in 0.1 mg/m<sup>3</sup>

<sup>d</sup> The models were adjusted for age, education, income, parity, activity, passive smoking, folic acid supplementation, iron supplementation, pre-pregnancy BMI, hypertension during pregnancy, gestational diabetes mellitus, vaginitis, temperature, and air pollutant in other two trimesters.

**Supplement Table 7** Association of air pollution exposure and PROM in co-pollutant models <sup>a</sup>

| Models             | PROM                            |               |
|--------------------|---------------------------------|---------------|
|                    | Adjusted <i>OR</i> <sup>b</sup> | 95% <i>CI</i> |
| PM <sub>2.5</sub>  |                                 |               |
| Single-model       | 1.08                            | (1.03,1.13)   |
| +SO <sub>2</sub>   | 1.08                            | (1.01,1.06)   |
| +CO                | 1.11                            | (1.01,1.22)   |
| PM <sub>10</sub>   |                                 |               |
| Single-model       | 1.11                            | (1.06,1.17)   |
| +SO <sub>2</sub>   | 1.02                            | (1.01,1.03)   |
| +CO                | 1.16                            | (1.02,1.31)   |
| SO <sub>2</sub>    |                                 |               |
| Single-model       | 1.16                            | (1.07,1.25)   |
| +PM <sub>2.5</sub> | 1.03                            | (1.01,1.05)   |
| +PM <sub>10</sub>  | 1.01                            | (0.98,1.04)   |
| CO                 |                                 |               |
| Single-model       | 1.09                            | (1.04,1.14)   |
| +PM <sub>2.5</sub> | 1.03                            | (1.00,1.06)   |
| +PM <sub>10</sub>  | 1.08                            | (1.03,1.13)   |

PROM: pre-labor rupture of membranes.

<sup>a</sup> Air pollution was in the second and third trimesters. The per increase in PM<sub>2.5</sub> and PM<sub>10</sub> was 10 µg/m<sup>3</sup>, the per increase in SO<sub>2</sub> was 5 µg/m<sup>3</sup>, and the per increase in CO was 0.1 mg/m<sup>3</sup>.

<sup>b</sup> Models was adjusted for age, education, income, parity, activity, passive smoking, folic acid supplementation, iron supplementation, pre-pregnancy BMI, hypertension during pregnancy, gestational diabetes mellitus, vaginitis, and temperature.

**Supplement Table 8** The estimated change in hemoglobin levels in third trimester was calculated for each quartile and each unit increment in PM<sub>2.5</sub>, PM<sub>10</sub>, SO<sub>2</sub>, and CO during the second and third trimesters using linear regression model.<sup>a</sup>

| Pollutants and Quartile<br>of Concentration                  | Hemoglobin           |                |
|--------------------------------------------------------------|----------------------|----------------|
|                                                              | $\beta$ <sup>b</sup> | 95% CI         |
| <b>PM<sub>2.5</sub>, <math>\mu\text{g}/\text{m}^3</math></b> |                      |                |
| Quartile 1 (<41.3)                                           | 0.00                 | —              |
| Quartile 2 (41.4–52.8)                                       | -3.29                | (-4.12, -2.46) |
| Quartile 3 (52.9–66.4)                                       | -3.62                | (-2.46, -2.83) |
| Quartile 4 ( $\geq$ 66.5)                                    | -4.03                | (-4.92, -3.14) |
| Continuous (per 10 $\mu\text{g}/\text{m}^3$ )                | -0.94                | (-1.15, -0.73) |
| <b>PM<sub>10</sub>, <math>\mu\text{g}/\text{m}^3</math></b>  |                      |                |
| Quartile 1 (<72.5)                                           | 0.00                 | —              |
| Quartile 2 (72.6–82.4)                                       | -2.58                | (-3.36, -1.80) |
| Quartile 3 (82.5–92.2)                                       | -3.92                | (-4.83, -3.01) |
| Quartile 4 ( $\geq$ 92.3)                                    | -4.62                | (-5.43, -3.80) |
| Continuous (per 10 $\mu\text{g}/\text{m}^3$ )                | -1.31                | (-1.55, -1.07) |
| <b>SO<sub>2</sub>, <math>\mu\text{g}/\text{m}^3</math></b>   |                      |                |
| Quartile 1 (<7.2)                                            | 0.00                 | —              |
| Quartile 2 (7.3–11.9)                                        | -4.08                | (-4.85, -3.30) |
| Quartile 3 (12.0–14.9)                                       | -4.62                | (-5.38, -3.86) |
| Quartile 4 ( $\geq$ 15.0)                                    | -5.09                | (-5.88, -4.30) |
| Continuous (per 5 $\mu\text{g}/\text{m}^3$ )                 | -2.96                | (-3.32, -2.61) |
| <b>CO, <math>\text{mg}/\text{m}^3</math></b>                 |                      |                |
| Quartile 1 (<0.794)                                          | 0.00                 | —              |
| Quartile 2 (0.795–0.896)                                     | -4.59                | (-5.35, -3.82) |
| Quartile 3 (0.897–1.033)                                     | -5.86                | (-6.66, -5.06) |
| Quartile 4 ( $\geq$ 1.034)                                   | -6.78                | (-7.54, -6.01) |
| Continuous (per 0.1 $\text{mg}/\text{m}^3$ )                 | -1.11                | (-1.31, -0.92) |

<sup>a</sup> The estimated change in hemoglobin levels in third trimester was calculated for each quartile and each unit increment in PM<sub>2.5</sub>, PM<sub>10</sub>, SO<sub>2</sub>, and CO during the second and third trimesters.

<sup>b</sup> The model was based on the line regression model and adjusted for age, education, income, activity, passive smoking, iron supplementation, pre-pregnancy BMI, hypertension during pregnancy, gestational diabetes mellitus, and temperature.

$\beta$  (per 1 g/L)

**Supplement Table 9** Association of air pollution exposure and hemoglobin levels in co-pollutant models <sup>a</sup>

| Model              | Hemoglobin |                |
|--------------------|------------|----------------|
|                    | $\beta^b$  | (95%CI)        |
| PM <sub>2.5</sub>  |            |                |
| Single-model       | -0.94      | (-1.15, -0.73) |
| +SO <sub>2</sub>   | 0.31       | (-3.49, 1.67)  |
| +CO                | -0.91      | (-1.04, -0.77) |
| PM <sub>10</sub>   |            |                |
| Single-model       | -1.31      | (-1.55, -1.07) |
| +SO <sub>2</sub>   | -2.92      | (-3.47, -2.38) |
| +CO                | -2.45      | (-2.86, -1.67) |
| SO <sub>2</sub>    |            |                |
| Single-model       | -2.96      | (-3.32, -2.61) |
| +PM <sub>2.5</sub> | -2.58      | (-3.49, -1.67) |
| +PM <sub>10</sub>  | -2.61      | (-3.52, -1.70) |
| CO                 |            |                |
| Single-model       | -1.11      | (-1.31, -0.92) |
| +PM <sub>2.5</sub> | -0.82      | (-0.93, -0.71) |
| +PM <sub>10</sub>  | -0.91      | (-1.04, -0.77) |

<sup>a</sup> Air pollution was in the second and third trimesters. The per increase in PM<sub>2.5</sub> and PM<sub>10</sub> was 10  $\mu\text{g}/\text{m}^3$ , the per increase in SO<sub>2</sub> was 5  $\mu\text{g}/\text{m}^3$ , and the per increase in CO was 0.1  $\text{mg}/\text{m}^3$ .

<sup>b</sup> Models was adjusted for age, education, income, parity, activity, passive smoking, folic acid supplementation, iron supplementation, pre-pregnancy BMI, hypertension during pregnancy, gestational diabetes mellitus, vaginitis, and temperature.

$\beta$  (1 unit g/L)

**Supplement Table 10** The relationship between hemoglobin levels and PROM risk in logistic models.

| Hemoglobin (g/L) | PROM              |              |
|------------------|-------------------|--------------|
|                  | OR                | 95% CI       |
| <100             | 2.44              | (1.73, 3.46) |
| 100-104          | 2.42              | (1.72, 3.41) |
| 105-109          | 2.40              | (1.73, 3.34) |
| 110-114          | 1.97              | (1.42, 2.73) |
| 115-119          | 1.77              | (1.27, 2.45) |
| 120-124          | 1.72              | (1.23, 2.42) |
| 125-129          | 1.52              | (1.05, 2.21) |
| ≥130             | 1.00 <sup>a</sup> | —            |

PROM: pre-labor rupture of membranes.

The relationship between hemoglobin levels in third trimester and PROM. The model was based on the logistic regression model and adjusted for age, education, income, parity, activity, active and passive smoking folic acid supplementation, iron supplementation, pre-pregnancy BMI, hypertension during pregnancy, gestational diabetes mellitus, vaginitis, and temperature.

<sup>a</sup> Reference group

**Supplement Table 11** Correlation matrix eigenvalues of multiple air pollutants model on second to third trimester and corresponding eigenvector

| Principal component | Correlation matrix eigenvalue |                   |                               | Corresponding eigenvector |                  |                 |        |
|---------------------|-------------------------------|-------------------|-------------------------------|---------------------------|------------------|-----------------|--------|
|                     | Eigenvalue                    | Contribution rate | Accumulated Contribution rate | PM <sub>2.5</sub>         | PM <sub>10</sub> | SO <sub>2</sub> | CO     |
| PC1                 | 3.615                         | 90.38             | 90.38                         | 0.956                     | 0.970            | 0.899           | 0.975  |
| PC2                 | 0.277                         | 6.93              | 97.31                         | -0.209                    | -0.134           | 0.423           | -0.002 |

PC1: First principal component

PC2: Second principal component

**Supplement Table 12** The association between iron supplementation and PROM risk stratified by air pollution levels in anemia women

| Pollutions <sup>a</sup> | Exposure level    | Iron supplementation, days/week | N    | Hemoglobin              | PROM              |                       |                                  |
|-------------------------|-------------------|---------------------------------|------|-------------------------|-------------------|-----------------------|----------------------------------|
|                         |                   |                                 |      | M±SD, g/L               | %                 | Unadjusted OR (95%CI) | Adjusted OR (95%CI) <sup>d</sup> |
| PM <sub>2.5</sub>       | <P75 <sup>f</sup> | ≥ 3                             | 711  | 114.5±10.6 <sup>b</sup> | 17.9 <sup>c</sup> | 0.70(0.51,0.98)       | 0.69(0.49,0.98)                  |
|                         |                   | < 3                             | 1141 | 112.0±11.0              | 19.5              | 0.78(0.58,1.06)       | 0.78(0.56,1.08)                  |
|                         | ≥P75              | ≥ 3                             | 129  | 111.5 ±9.1              | 21.7              | 0.90(0.55,1.47)       | 0.88 (0.53,1.46)                 |
|                         |                   | < 3                             | 309  | 110.8±10.1              | 23.6              | 1.00 <sup>e</sup>     | 1.00 <sup>e</sup>                |
| PM <sub>10</sub>        | <P75              | ≥ 3                             | 700  | 114.5±10.5 <sup>b</sup> | 17.7 <sup>c</sup> | 0.62(0.45,0.85)       | 0.64(0.45,0.91)                  |
|                         |                   | < 3                             | 1127 | 112.0±11.0              | 19.9              | 0.73(0.53,1.01)       | 0.75(0.55,1.01)                  |
|                         | ≥P75              | ≥ 3                             | 140  | 111.9±9.7               | 22.1              | 0.76(0.46,1.25)       | 0.75(0.46,1.25)                  |
|                         |                   | < 3                             | 323  | 108.0±10.0              | 22.0              | 1.00 <sup>e</sup>     | 1.00 <sup>e</sup>                |
| CO                      | <P75              | ≥ 3                             | 740  | 114.6±10.2 <sup>b</sup> | 18.1 <sup>c</sup> | 0.72(0.54,0.95)       | 0.59(0.43,0.81)                  |
|                         |                   | < 3                             | 1143 | 112.4±10.9              | 18.6              | 0.79(0.61,1.02)       | 0.58(0.32,1.04)                  |
|                         | ≥P75              | ≥ 3                             | 100  | 110.1±10.7              | 21.0              | 0.93(0.65,1.34)       | 0.73(0.42,1.27)                  |
|                         |                   | < 3                             | 307  | 108.1±10.0              | 22.7              | 1.00 <sup>e</sup>     | 1.00 <sup>e</sup>                |
| SO <sub>2</sub>         | <P75              | ≥ 3                             | 732  | 114.6±10.2 <sup>b</sup> | 18.3 <sup>c</sup> | 0.69(0.49,0.97)       | 0.70(0.50,0.98)                  |
|                         |                   | < 3                             | 1144 | 112.2±10.9              | 19.1              | 0.74(0.54,1.02)       | 0.73(0.53,1.00)                  |
|                         | ≥P75              | ≥ 3                             | 108  | 110.3±11.0              | 19.4              | 0.72(0.41,1.25)       | 0.73(0.42,1.27)                  |
|                         |                   | < 3                             | 306  | 110.0±10.0              | 24.8              | 1.00 <sup>e</sup>     | 1.00 <sup>e</sup>                |

PROM: pre-labor rupture of membranes. <sup>a</sup> Air pollution was in the second and third trimesters.

<sup>b</sup> P for trend of hemoglobin levels across four groups was < 0.001, < 0.001, < 0.001, < 0.001, respectively.

<sup>c</sup> P for the trend of PROM across four groups was 0.023, 0.022, 0.042, 0.002, respectively.

The test for P-trend was performed using general linear regression model and Mantel-Haenszel chi-square test in hemoglobin levels and PROM prevalence across above four groups.

<sup>d</sup> Models adjusted for age, education, income, parity, activity, active and passive smoking, folic acid supplementation, iron supplementation, pre-pregnancy BMI, hypertension during pregnancy, gestational diabetes mellitus, vaginitis, and temperature.

<sup>e</sup> Reference group

<sup>f</sup> The 75<sup>th</sup> percentile for the exposure during second and third trimester was 66.5 µg/m<sup>3</sup> for PM<sub>2.5</sub>, 92.3µg/m<sup>3</sup> for PM<sub>10</sub>, 14.9µg/m<sup>3</sup> for SO<sub>2</sub>, 1.03 mg/m<sup>3</sup> for CO, respectively.



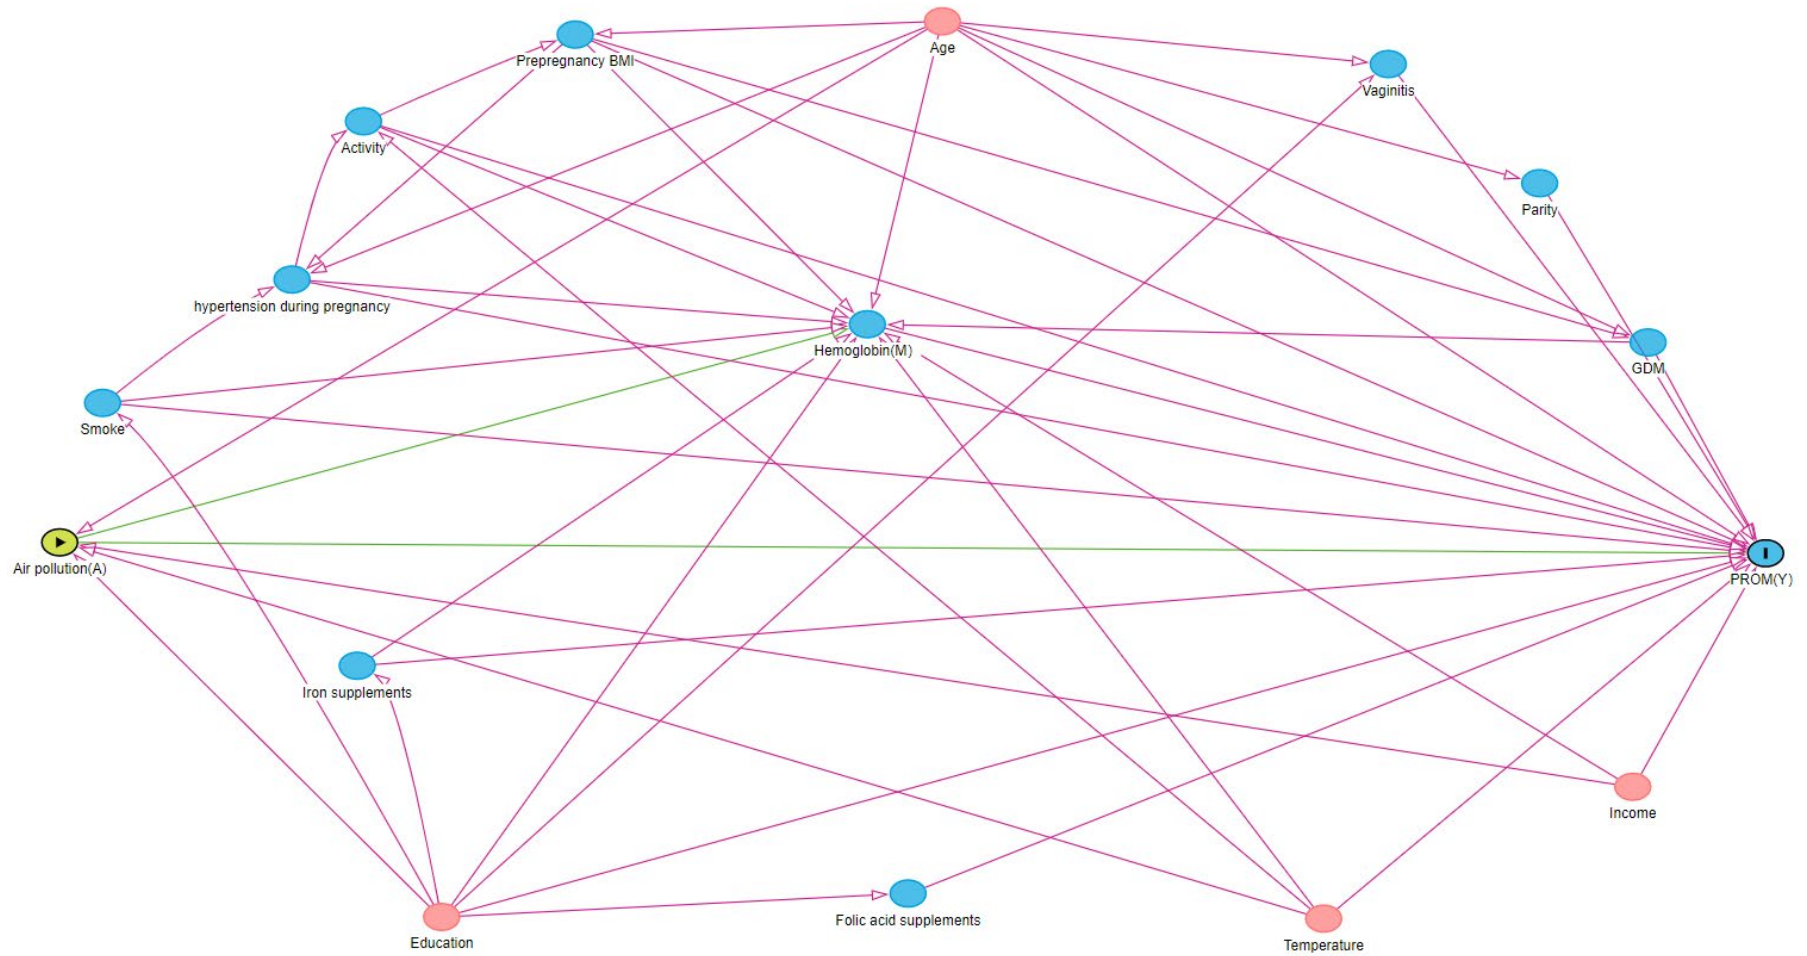

**Supplement Figure 1** Directed acyclic graph for the association between air pollution exposure and PROM  
 GDM: Gestational diabetes mellitus, PROM: pre-labor rupture of membranes.  
 (A): exposure, (M): mediator, (Y): outcome
