# Supplementary material
Source: PubMed Central journal article supplement (PMC10116877)
Supplement: ehp11134.smcontents.508.pdf [file ehp11134.smcontents.508.pdf]

**Note to readers with disabilities:** *EHP* strives to ensure that all journal content is accessible to all readers. However, some figures and Supplemental Material published in *EHP* articles may not conform to [508 standards](#) due to the complexity of the information being presented. If you need assistance accessing journal content, please contact [ehp508@niehs.nih.gov](mailto:ehp508@niehs.nih.gov). Our staff will work with you to assess and meet your accessibility needs within 3 working days.

### **Supplemental Material**

#### **Prenatal Exposure to Air Pollution and Pre-Labor Rupture of Membranes in a Prospective Cohort Study: The Role of Maternal Hemoglobin and Iron Supplementation**

Lin Wu, Wan-jun Yin, Li-jun Yu, Yu-hong Wang, Xiao-min Jiang, Ying Zhang, Fang-biao Tao, Rui-xue Tao, and Peng Zhu

#### **Table of Contents**

**Table S1.** The general characteristics of the study population during 2015 to 2021 in Hefei [n (%)].

**Table S2.** Correlations of air pollution in the prenatal period.

**Table S3.** The PROM risk in association with week-specific prenatal air pollution exposure during pregnancy.

**Table S4.** Cumulative effects and average effects between air pollutant exposure and PROM risk Distributed Lag Model and logistic regression model.

**Table S5.** Cumulative effects and average effects between air pollutant exposure and PROM risk Distributed Lag Model and logistic regression model after adjusting the trimester.

**Table S6.** Association of prenatal air pollution exposure with the term PROM and preterm PROM.

**Table S7.** Association of air pollution exposure and PROM in co-pollutant models.

**Table S8.** The estimated change in hemoglobin levels in third trimester was calculated for each quartile and each unit increment in PM<sub>2.5</sub>, PM<sub>10</sub>, SO<sub>2</sub>, and CO during the second and third trimesters using linear regression model.

**Table S9.** Association of air pollution exposure and hemoglobin levels in co-pollutant models.

**Table S10.** The relationship between hemoglobin levels and PROM risk in logistic models.

**Table S11.** Correlation matrix eigenvalues of multiple air pollutants model on second to third trimester and corresponding eigenvector.

**Table S12.** The association between iron supplementation and PROM risk stratified by air

**Figure S1.** Directed acyclic graph for the association between air pollution exposure and PROM  
GDM: Gestational diabetes mellitus, PROM: pre-labor rupture of membranes.
